# Supplementary material for: Association between risk factors and bone mineral density and the development of a self-assessment tool for early osteoporosis screening in postmenopausal women with type 2 diabetes
Source: PeerJ. 2024 Oct 11;12:e18283. doi: 10.7717/peerj.18283 (PMC11472793; doi:10.7717/peerj.18283)
Supplement: Supplemental Information 1 [file peerj-12-18283-s001.xlsx]

## Sheet: Training dataset
Supplementary Table 1. Training dataset of patients' age, BMI, and osteoporosis status for model development
age	BMI	Osteoporosis=1; Non-osteoporosis=0
63	22.5069	1
67	27.4714	0
60	23.5078	0
60	18.0662	0
65	20.0288	1
74	27.7778	1
75	24.974	1
72	21.9388	1
65	23.5078	0
71	18.8776	1
70	22.5215	1
73	25.9695	0
73	25.4767	0
63	20.0777	1
76	24.974	1
56	26.0226	0
54	19.2277	0
63	23.4375	0
52	21.7555	0
72	24.0344	1
59	21.875	0
71	23.4375	0
76	28.8889	0
56	26.3465	0
76	24.4444	1
66	20	0
57	26.3702	0
88	20.9275	1
73	22.8928	1
80	25.3906	1
63	21.0937	0
62	23.8751	1
55	19.3772	0
68	18.7305	1
57	25.0762	0
70	30.8594	1
72	22.6003	0
65	23.7253	0
55	21.3382	0
61	23.4375	0
68	30.4272	0
67	24.0346	0
51	23.5304	0
70	23.1473	0
54	31.25	0
73	23.4375	0
59	19.8642	1
60	20.7008	0
52	20.2913	0
57	20.7031	0
73	27.7778	1
65	22.6667	0
58	25.8645	0
63	20.4082	0
58	25.3906	0
65	26.0262	0
66	21.9098	0
83	19.313	1
65	24.6548	0
72	28.7201	0
60	20.7008	0
69	24.0346	0
54	20.0288	0
51	23.5304	0
66	20.8117	1
77	32.7919	0
54	31.25	0
63	25.1039	0
65	22.6562	1
61	20.7967	0
71	24.6097	0
52	24.093	0
83	19.313	1
52	26.0375	0
79	20.2848	1
75	19.7777	0
75	33.3333	0
75	28.1479	0
70	23.833	1
55	17.1468	0
72	24.0346	0
69	23.4375	0
69	25.3906	0
58	22.9568	0
66	27.3437	0
72	19.9792	0
56	15.1489	0
73	17.4818	1
77	23.1111	1
65	23.9512	0
71	22.2222	1
73	21.7778	1
68	20.202	0
66	23.8054	0
90	18.3655	0
76	25.5588	1
59	27.4714	0
61	20.5078	0
64	21.9261	0
66	26.6667	0
75	24.974	0
69	22.0317	0
57	23.9334	0
59	25.6369	0
78	21.0303	0
59	25.2363	0
70	23.4375	0
75	20.0288	0
58	25	0
85	19.437	1
70	33.3333	0
70	23.1111	1
73	20.7008	0
69	27.0552	1
67	26.0375	0
69	22.8928	1
72	24	1
76	20.9572	1
75	29.3848	0
56	20.4491	0
63	19.5312	0
73	30.2978	0
56	23.4375	0
70	22.4609	0
52	23.6275	0
54	19.563	0
59	35.0293	0
77	25.5367	0
59	31.1111	0
79	31.6404	1
72	24.4444	0
72	20.9572	0
64	23.4375	1
57	24.3418	0
85	26.6667	0
69	22.9592	1
70	26.635	1
51	18.4911	0
61	19.9219	1
63	25.9695	0
79	27.2392	0
61	25.2363	0
57	29.2184	0
55	23.0518	0
62	22.7732	0
50	26.6728	0
69	21.4031	1
63	27.7662	1
81	25.3906	0
69	24.7475	0
62	27.0552	0
63	24.4444	0
70	27.8159	1
70	26.0375	0
72	29.9688	0
69	24.7475	0
69	20.1348	1
61	23.6476	0
75	18.7305	1
75	27.3438	0
66	19.052	1
71	26.3146	1
69	28.4444	1
64	25.6312	0
64	21.6441	0
72	22.9592	1
66	23.8054	1
65	20.3125	1
68	23.1247	0
69	22.3674	0
59	30.4438	0
78	22.6667	1
70	23.7332	0
69	22.1367	0
63	21.573	0
63	20.9366	1
73	30.0433	0
81	23.4375	1
59	25	0
62	20.3954	1
76	26.6667	1
87	20.8117	1
70	22.0317	0
71	19.025	1
72	27.3438	0
64	25.7812	0
67	21.4844	0
79	20.7031	0
66	16.4237	1
58	28.2284	0
64	24	0
77	24.974	0
68	29.2969	1
60	22.4813	1
71	23.4339	0
54	19.2837	0
65	21.83	0
58	20.3954	0
74	33.3333	0
71	26.6667	1
74	22.2222	1
77	19.5312	0
63	25.4524	1
79	27.3438	1
69	20.7008	0
67	23.4375	1
67	22.6847	1
57	23.1111	0
80	23.8281	0
54	22.6326	0
56	18.3594	0
75	23.4375	1
74	23.2335	0
63	24.4646	0
75	26.9531	1
58	32.8824	0
57	19.5312	0
58	23.7954	0
63	18.6709	0
64	35.1562	0
54	23.1111	0
69	17.4449	0
72	27.8	1
59	25.7117	0
71	33.7778	0
85	23.9224	0
61	25.3331	1
73	23.6832	1
62	17.2879	1
56	22.6562	0
77	22.8928	1
59	22.8928	1
74	23.7118	1
58	23.634	0
66	30.4688	0
72	21.2279	1
69	25.7812	0
59	25.3906	0
84	27.3923	0
52	19.5312	0
71	21.5045	1
52	20.7008	0
72	20.1348	1
64	22.6562	0
70	25.0995	1
71	19.2837	1
58	19.6506	0
73	21.0077	1
72	24.539	1
59	23.1473	0
77	26.6667	1
59	22.8624	0
76	20.8117	1
65	20.4444	0
45	24.4444	0
70	29.2969	0
57	28.5156	0
69	24.4444	0
88	31.1111	0
69	18.026	0
59	23.3377	0
61	24.6094	0
55	22.0317	0
74	22.0317	0
62	20.1348	1
78	21.2306	1
65	30.0433	0
70	17.4818	1
68	22.8329	0
72	26.4024	1
63	23.939	0
73	34.209	0
55	19.7266	1
63	22.8624	1
72	19.9219	1
77	14.382	1
68	27.3484	0
59	20.5457	0
65	19.8681	1
78	24	1
63	27.164	1
53	24	0
61	22.0703	0
53	22.0386	0
70	27.3438	1
62	23.0332	1
58	27.0993	0
72	19.9219	1
51	22.0317	0
63	18.3143	0
52	20.3954	0
68	22.0317	0
79	23.634	1
67	21.7778	1
60	19.6752	0
61	23.8751	0
56	22.0741	0
72	21.9289	0
61	22.806	0
72	23.833	1
60	26.1719	0
70	24.7475	1
56	25.8876	0
62	21.4844	0
61	26.6728	1
55	22.2222	0
69	24.8875	1
67	17.4818	0
63	20.0288	0
84	19.91	1
68	19.2277	0
69	26.6667	0
57	24.6548	0
71	26.6728	0
64	22.8928	0
59	18.75	1
69	17.7778	1
66	16.0231	1
76	26.2222	0
65	26.2227	0
80	28.5375	0
69	26.1719	0
81	24.974	1
72	28.4618	0
57	20.3125	1
68	24.8875	0
77	26.0375	0
72	24.974	1
75	34.1749	0
64	23.3355	1
70	22.6667	1
64	20.9566	1
80	26.6667	1
62	26.1066	0
73	22.0317	0
74	24	1
55	25.9701	0
50	27.7778	0
56	18.4911	1
68	19.052	0
78	31.2175	1
70	29.3848	0
64	19.1953	0
64	28.0404	0
62	25.8065	0
58	22.3757	1
45	28.764	0
72	26.1593	0
64	21.6311	0
73	24.1672	0
55	21.4844	0
73	24.2188	0
63	22.8928	1
69	20.8117	1
66	24.1389	0
72	27.7008	0
62	24.7768	1
84	25.3333	1
54	15.2714	0
73	29.6665	0
75	28.2284	0
67	27.5556	0
66	22.4766	1
86	22.4766	1
59	22.1893	0
71	20	1
56	21.2279	0
76	22.4323	0
61	30.1103	0
59	22.0386	0
69	27.3333	1
49	22.6003	1
60	18.6268	1
66	20.8984	1
63	21.6413	0
73	28.578	0
73	20.5457	0
64	26.9357	1
65	22.5827	0
75	20.8117	0
74	20.3125	1
53	18.4676	1
73	20.5457	0
64	20.7756	1
73	28.578	0
76	32.0461	1
51	23.5556	0
70	21.2585	1
64	21.3346	1
63	23.7812	1
68	18.7305	1
65	20.1348	1
72	21.3333	1
68	29.5858	1
60	23.8751	0
79	24.3496	1
53	24.4141	0
60	24.6548	1
71	24.0346	0
79	19.0274	1
67	33.2031	1
63	20.5078	0
73	26.6667	0
70	25.0361	1
67	24.4444	0
62	25.9909	0
65	22.0317	1
70	17.9982	1
56	24.9581	0
58	29.3847	0
71	28.5075	0
68	26.0375	0
75	24.3266	0
56	21.9076	0
51	23.1247	0
65	25.1096	1
58	23.0112	0
73	23.3091	1
75	24.8408	0
57	23.0469	0
51	24.7676	0
67	22.6667	0
63	22.3094	1
55	27.7008	0
78	24.2568	1
70	26.7094	1
78	23.4159	1
71	22.2222	0
68	22.8928	1
59	24.7934	0
64	24.6097	0
72	30.8185	0
72	22.4609	1
55	23.4375	0
74	23.4221	1
54	23.1111	1
59	19.6752	0
81	22.5069	1
65	22.0604	1
62	22.6409	0
76	19.5312	1
57	27.7344	0
70	23.9224	1
67	19.3962	1
75	27.6787	1
53	22.8624	0
79	23.8751	1
64	22.9568	0
65	21.7778	0
60	22.5827	1
75	26.1593	1
70	28.8889	0
82	30.2519	1
57	20.8889	0
67	25.7117	0
56	27.3438	0
68	23.5556	0
47	21.3333	0
74	23.4375	1
70	28.4799	0
74	26.3779	1
72	23.74	1
72	25	0
75	21.3333	1
77	20.6612	1
62	28.0404	0
79	29.2101	0
69	22.2222	0
81	29.3333	0
72	26.6667	0
77	22.6409	1
68	24.0346	0
70	23.634	0
76	19.2234	1
55	17.1875	1
69	22.0317	1
70	20.8117	0
82	20.8117	1
82	26.0375	1
72	21.0303	1
70	26.635	0
68	20	1
69	22.4766	1
76	24.3865	0
71	24.6669	0
63	26	0
71	21.6041	0
72	23.8281	0
55	21.0962	0
81	25.0762	0
68	23.5078	0
61	22.8624	0
74	21.4536	0
67	22.6003	1
69	24.8016	0
68	21.4844	1
63	18.75	0
81	22.0604	1
58	23.1481	1
70	20.8117	0
74	27.3438	0
78	34.2222	1
68	18.2563	1
75	32.4557	0
64	19.6506	1
71	23.4221	1
64	21.4844	0
69	29.0487	0
57	29.6749	0
75	22.2137	1
53	22.4766	0
70	23.4566	0
69	21.2084	1
71	23.8054	1
69	19.4771	0
63	25.3906	0
67	19.5312	1
68	28.7201	1
63	24.2031	0
57	22.4766	0
68	23.5556	1
75	19.0274	1
63	26.5625	0
59	28.845	0
57	19.1406	0
64	25.3906	1
77	22.4766	1
70	26.0375	0
55	20.6011	1
73	25.4767	0
63	21.7578	0
59	24.8875	0
72	25.1486	1
67	22.9398	0
76	25.3906	1
56	21.0772	0
73	28.7201	1
55	20.3125	0
51	27.6888	0
58	25.3906	0
70	23.833	1
66	29.0006	0
69	24.1672	1
57	23.4375	0
59	21.4844	0
66	27.7671	0
57	26.6728	0
71	20.8117	1
60	25.2363	0
74	30.4272	1
68	26.7405	0
48	23.5556	0
73	21.6413	1
59	26.3465	0
74	23.4375	0
68	20.4503	1
72	21.4844	0
56	21.0828	0
60	22.7732	0
56	30.8594	0
66	27.0552	1
69	22.6003	1
69	28.3987	0
71	22.6562	1
74	27.5873	0
73	21.7778	0
62	23.1911	0
69	18.7652	1
75	34.9636	0
64	21.4536	0
77	21.0828	0
81	21.4844	0
77	22.2222	1
58	21.2279	0
56	24.0588	0
78	23.3056	1
56	26.3702	0
64	22.4813	1
62	17.2248	1
84	23.4632	1
70	32.0459	1
69	27.7008	1
73	32.3884	0
69	25.5588	1
73	23.1911	0
54	22.8624	0
58	25.5556	0
64	32.0073	0
57	25.1177	0
68	24.6548	1
85	20.2222	1
57	26.1719	0
76	21.1111	0
63	23.634	0
83	27.3438	0
61	22.4766	1
78	22.7694	1
78	20.9644	1
73	25.9695	1
69	27.5535	1
59	29.0006	0
54	24.1588	0
64	19.5312	0
57	31.1111	0
57	21.6441	0
59	19.7168	1
62	23.8054	0
58	24.6355	1
78	22.4609	0
58	20.202	1
59	19.2894	0
59	25.3906	0
85	20.1348	1
65	24.0346	1
72	21.7784	1
72	26.6667	0
73	23.1105	1
55	19.5556	1
66	23.7253	0
53	31.2213	0
65	21.0962	0
78	27.5556	0
63	19.433	0
57	24.0234	1
59	22.8269	0
51	20.1172	0
58	30.8594	0
66	30.3461	0
57	19.2234	1
75	27.2096	1
52	32.0461	0
85	24.4646	0
45	24.974	0
58	21.2305	0
63	19.2894	1
53	20.3856	0
63	21.7738	1
61	23.4224	1
72	20.1951	1
67	22.6121	1
69	25.6312	0
78	23.4375	1
70	23.3377	1
57	20.83	0
55	22.8624	0
65	27.3437	0
68	18.4265	1
65	27.3438	0
68	24.8047	0
52	23.4375	0
57	20.8889	0
67	27.0552	1
53	22.2222	0
58	26.6667	0
66	20.4467	0
59	18.7305	1
58	25.4	0
57	24.6132	0
59	24.0346	0
64	28.5375	0
71	25.3906	0
73	24.4627	1
73	15.5556	1
63	27.8876	1
57	18.5491	0
58	26.5731	0
73	24.8875	0
73	20.73	1
66	25.3906	0
55	23.8754	0
74	21.3675	1
67	22.8928	0
63	27.7344	0
64	23.9224	0
63	23.3887	1
73	27.1125	1
69	22.1893	0
67	23.7253	1
72	19.487	1
80	24.974	1
55	27.6817	0
59	23.4221	0
72	21.4031	0
59	27.268	1
67	20.9572	1
75	29.2184	1
67	20	1
68	22.4756	0
60	17.5294	1
56	26.0584	0
68	19.2277	1
60	24.8833	0
59	26.1066	0
58	23.9334	1
64	22.9214	1
68	28.2284	1
50	19.2974	0
57	22.9591	0
71	23.5078	0
65	20	1
66	23.3333	1
58	26.1066	0
60	23.4375	0
59	24.8358	0
58	18.1955	1
62	21.0962	1
72	24.375	0
74	25.2174	1
72	26.6667	0
64	19.5717	1
61	21.2279	0
72	26.0375	0
68	19.9792	1
73	18.7305	1
63	25.0762	0
65	23.4375	1
73	27.3437	0
61	30.4272	0
54	25.3906	0
70	17.6309	1
76	20.0288	1
56	18.4911	1
57	31.25	1
79	21.4844	1
56	22.8906	0
70	25.3906	0
70	30.1103	0
72	23.2335	1
68	26.5625	1
74	23.2335	0
63	18.0994	1
66	20.5457	0
63	16.2222	1
77	25.7117	0
63	20.0288	0
61	23.0861	0
57	23.1111	0
64	20.8889	1
63	22.6429	1
59	21.9076	0
53	24.0055	0
68	27.1111	0
59	20.5239	1
75	19.1111	1
56	28.0404	0
64	19.5312	0
60	21.9098	1
77	16.2331	1
71	25.6	0
58	21.2279	1
65	25.8065	0
70	25.6369	0
73	26.0375	0
53	27.7778	0
56	22.5069	0
62	22.8928	0
53	27.7767	0
76	20.0288	1
67	25.2994	1
63	18.75	0
60	24.4444	0
50	27.5482	0
55	21.4844	0
84	25	1
83	39.1111	0
59	19.3359	0
56	23.2434	0
57	22.0317	0
56	21.7778	0
64	23.6128	0
84	26.4381	1
69	19.1467	1
76	23.2434	1
76	22.3478	1
57	21.4844	0
68	19.5312	1
70	25.3333	0
55	25.2826	0
55	22.8928	0
75	22.2222	1
70	23.4375	1
75	20.872	1
68	23.7954	0
51	24.2187	0
65	21.0828	1
77	27.3437	0
60	25.1559	0
70	20.5457	1
65	21.1203	1
73	24.653	0
55	25.6544	0
59	23.4375	0
60	25.1559	0
78	23.2434	1
69	19.1467	1
84	26.4381	1
64	23.6128	0
56	22.8269	0
74	20	1
81	18.5493	1
52	17.5146	1
54	24.0346	0
56	22.8269	0
81	18.5493	1
53	23.4375	0
65	21.7555	0
72	18.7305	0
64	23.7778	1
59	29.1363	0
84	25.6312	1
78	26.3702	0
60	29.1363	1
58	23.4375	0
71	26.2917	0
65	22.8928	1
67	24.3496	1
68	23.634	1
67	21.3333	1
54	26.0375	0
79	25.2363	1
70	23.3355	1
77	21.8522	0
53	23.1111	1
51	26.6667	0
63	22.4323	1
61	17.2421	0
59	21.048	1
71	22.0317	1
64	24.974	1
81	20.8117	1
55	25.4767	0
60	23.5556	0
69	22.1367	0
73	23.4236	0
51	21.2279	0
65	24.7676	0
53	23.1473	1
65	20.9566	1
65	20.8117	0
57	20.4294	1
80	27.7367	0
55	23.5556	0
66	21.0303	0
55	25.0762	0
66	19.0311	1
68	21.0938	0
73	27.3438	1
83	26.2713	0
50	22.2222	0
68	22.6667	0
67	26.7094	1
71	19.5312	0
63	21.2183	0
71	19.3685	1
58	27.3438	1
82	22.8368	0
66	20.7031	1
63	19.985	1
67	29.7355	1
69	25.9695	1
68	17.7778	1
69	22.0386	1
66	23.4375	0
61	23.4375	0
59	21.6311	0
73	24.974	0
75	24.4141	1
69	17.2737	1
66	25.0995	1
61	23.3844	1
80	29.1363	1
72	17.6899	1
59	28.3203	0
69	23.8281	1
68	27.3438	0
68	15.8169	1
72	26.0375	0
72	27.0552	1
73	30.2978	0
73	26.3702	1
61	24.6094	0
51	28.3531	0
74	30.902	1
72	26.6667	0
74	21.0007	1
54	27.0051	0
61	25.3902	0
51	22.231	0
68	19.7777	1
63	22.806	1
63	20.1172	1
78	23.8343	0
55	21.2891	0
72	22.6562	1
54	23.4375	0
69	18.7379	0
74	24.4444	0
64	28.2882	1
64	23.4375	1
65	24.8669	0
75	23.5237	0
67	25.189	1
64	22.2222	1
81	23.3355	0
60	23.0332	0
62	20.6094	0
74	28.6412	1
61	28.764	0
65	15.5556	1
58	17.7778	1
68	24.974	0
75	27.0552	0
65	26.5731	1
67	21.6837	1
63	20	1
