# Supplementary material for: Association between risk factors and bone mineral density and the development of a self-assessment tool for early osteoporosis screening in postmenopausal women with type 2 diabetes
Source: PeerJ. 2024 Oct 11;12:e18283. doi: 10.7717/peerj.18283 (PMC11472793; doi:10.7717/peerj.18283)
Supplement: Supplemental Information 2 [file peerj-12-18283-s002.xlsx]

## Sheet: Sheet1
age	BMI	outcome
58	27.3438	0
65	25.3906	1
66	25.9695	0
60	22.5827	0
59	21.5019	0
73	22.3081	1
76	23.5556	1
60	22.5827	0
55	20.9572	0
76	26.6667	0
80	24.6548	1
70	19.7777	1
64	19.7777	1
77	19.5717	1
55	25.3444	0
58	22.0317	0
59	23.7332	0
66	23.3091	1
59	31.5115	0
48	21.0962	0
64	21.1111	1
59	24.5578	1
57	21.7865	1
82	24.4946	1
82	27.7662	1
80	21.9289	1
72	19.487	0
60	24.2188	1
60	29.0418	0
58	25.3155	0
55	20.3125	1
59	19.052	1
56	20.8209	1
57	29.9967	0
64	22.4273	0
77	24.974	1
62	20.7612	0
54	27.6304	1
59	24.196	0
71	25.6544	1
67	24.7921	0
53	27.0552	0
69	20.7031	0
55	22.4996	0
59	19.9792	1
59	23.7332	0
57	24.6094	0
73	24.4444	1
61	22.8928	1
62	24.2222	0
55	25.1953	0
66	23.6832	0
61	20.9366	0
77	31.8878	0
76	21.3333	1
62	24.1127	1
68	31.5556	0
62	22.8928	1
79	30	1
66	25.3906	0
60	24.7967	0
64	16.8574	0
73	20.4294	1
70	17.8506	1
70	33.7325	1
68	20.9321	1
81	19.6752	1
74	34.2936	1
75	30.8594	1
68	22.4323	1
61	24	1
63	21.7784	0
75	24.864	1
74	23.9334	0
68	22.2222	1
75	20.3716	1
69	23.7843	1
81	20.1733	1
64	44.0771	0
68	24.2439	0
75	31.6337	1
73	27.268	0
52	27.2392	0
71	24.5675	0
69	22.7732	1
70	20.4294	1
57	21.7555	0
73	24.8889	0
52	26.7094	0
65	26.5625	0
65	26.5625	0
60	19.1467	1
70	24.5578	1
70	22.151	0
48	18.7107	1
70	22.8329	1
54	22.6757	0
61	19.2277	1
75	23.4221	0
62	20.4294	1
75	20.7756	1
61	26.3702	0
68	25.9505	1
84	21.7778	1
57	22.3757	0
70	19.1406	1
57	25.9645	0
65	15.7505	1
68	27.5556	1
71	21.6413	0
59	26.6667	1
57	27.0552	0
58	21.6441	0
74	24.5675	1
58	23.634	0
62	18.7328	1
76	24.0882	0
53	34.2936	0
75	21.8522	1
79	24.7325	1
64	29.7778	1
74	22.7615	1
72	23.9361	0
59	24.4646	0
66	23.1111	1
72	21.5045	1
60	29.5525	0
51	23.533	0
57	28.9341	0
61	27.3438	0
72	27.1111	1
71	27.3438	1
59	21.4844	1
67	29.2969	1
72	24.1415	0
64	23.1473	0
66	27.4348	0
63	27.3333	0
79	24.2568	1
73	24.064	0
