# Supplementary material for: Association between risk factors and bone mineral density and the development of a self-assessment tool for early osteoporosis screening in postmenopausal women with type 2 diabetes
Source: PeerJ. 2024 Oct 11;12:e18283. doi: 10.7717/peerj.18283 (PMC11472793; doi:10.7717/peerj.18283)
Supplement: Supplemental Information 3 [file peerj-12-18283-s003.xlsx]

## Sheet: Sheet1
age	BMI	outcome
52	18.4265	0
76	23.7118	1
65	25.3906	0
79	24.0346	1
58	26.9274	0
70	21.2279	0
58	23.473	0
70	21.875	0
62	27.3438	1
77	26.1249	0
78	21.3333	1
70	26.1719	1
62	18.9745	1
71	23.7812	1
75	23.4221	0
56	23.833	0
69	22.4059	1
68	22.0386	0
69	25.5661	1
68	23.4375	1
58	21.4536	0
58	25.3906	0
71	23.4952	0
85	22.6757	0
58	28	0
75	23.4375	1
72	25.1039	0
67	28.8754	0
72	23.8054	1
78	23.9224	1
59	17.8359	0
55	23.4375	0
73	20.0288	0
80	21.7778	1
63	24.974	0
64	21.8787	1
71	24.4444	0
58	22.4766	0
57	22.6562	0
64	20.5457	1
57	21.9363	0
56	25.7812	0
59	20.8117	0
70	24.1415	1
67	18.8271	1
84	17.7778	1
70	21.9816	0
69	25.2363	1
75	22.4444	0
71	20.9321	0
74	26.6667	1
73	21.9899	0
68	25.3906	0
76	25.5102	0
57	21.4844	0
63	28.8889	0
55	27.9421	0
57	24.4352	0
73	22.8928	1
85	19.5312	0
60	22.0317	0
73	25.7117	0
80	22.2685	1
67	24.0346	0
68	21.0198	1
58	24.8875	0
82	24.974	1
50	28	0
72	28	1
70	23.3275	1
70	25.3444	0
61	24.974	1
52	22.2656	0
66	25.9695	0
75	25.1039	0
62	26.2222	0
62	21.1111	0
78	20.7756	1
75	21.4031	1
58	19.2277	1
76	27.5862	1
88	22.6562	1
74	26.6667	0
57	26.3672	0
74	25.9695	1
67	23.2335	0
58	30.0215	0
74	28.0618	1
76	22.2222	0
74	31.1111	0
56	22.7444	0
65	22.2222	0
70	30.9156	1
71	21.875	0
54	27.6888	0
70	22.8624	0
74	27.551	1
65	22.0386	1
59	22.0317	0
75	26.2227	0
57	21.7778	0
75	16.2331	1
87	25	1
73	17.2737	1
65	20.5592	0
66	35.584	1
69	30.4577	0
70	23.3424	0
62	25.1532	0
79	24.8603	1
66	25.8876	0
62	25.1039	0
59	25.204	0
75	19.4363	1
65	19.736	0
65	20	0
89	19.5312	1
69	25.5501	0
86	25.3906	1
65	24.6094	0
63	24.0234	0
70	22.6562	0
63	22.0317	0
59	28	0
64	27.1918	1
71	23.4952	0
75	26.0584	0
66	26.7698	0
74	24.4141	1
65	21.4844	1
75	26.1427	0
80	24.5949	0
70	17.3577	1
73	24.4444	0
56	24.7475	0
79	22.0711	0
71	27.3399	1
80	25.7778	1
65	27.1918	1
55	26.0262	0
73	21.9261	1
69	25.4524	0
67	26.2227	0
64	24.4352	0
66	23.0681	0
67	27.4077	0
50	28.125	0
86	29.4887	1
73	21.9839	0
58	22.8624	0
73	31.1111	0
57	23.3056	0
64	25.1096	1
74	25.4767	0
65	29.3413	0
84	24.9422	0
73	21.58	1
71	24.974	1
84	25.4438	1
74	24.8889	0
61	26.7532	0
65	27.0552	0
71	27.8293	0
82	22.72	0
88	24.653	1
69	32.4444	0
53	26.5625	0
67	24.4444	1
82	24	0
60	25.3069	0
82	25.5102	0
53	25.3906	0
70	28.3987	0
67	23.2335	1
68	23.8054	1
83	18.4911	1
71	29.8233	1
70	24.7325	1
64	24.653	0
71	26.0375	1
73	31.6885	1
65	22.2222	1
66	24.0346	0
80	29.1363	0
71	25.2081	1
76	17.0874	1
57	23.3091	0
71	31.2175	1
69	21.0938	1
55	29.5525	0
76	29.3724	0
71	27.5312	1
57	26.0375	0
61	28.3053	1
84	31.1111	0
66	25.9695	0
75	26.7532	0
75	27.9267	0
88	18.7652	1
64	22.213	1
63	23.4224	1
76	32.039	1
76	22.9592	1
55	22.0386	0
73	21.9098	1
57	23.0518	0
57	19.563	1
64	24.0346	1
73	28.1337	0
72	23.3333	1
72	22.7467	0
67	21.9138	1
74	26.0584	0
74	22.8624	1
72	27.0552	1
54	30.0433	0
75	21.9138	0
68	26.9531	0
56	21.5139	0
65	21.0938	0
65	27.7671	1
83	24.974	0
75	26.4855	1
81	28.1337	1
77	21.5139	1
65	24.974	1
82	21.6413	1
57	24.6094	0
71	32.2266	1
69	16.6335	0
80	29.756	0
70	33.3333	1
68	26.3779	0
83	24.8889	1
62	20.2848	0
57	21.3675	0
80	33.2986	0
66	25.3906	1
74	27.1111	1
63	18.0172	0
56	25.5296	0
71	28.9461	0
67	26.2227	0
74	29.4321	0
78	17.7096	0
62	21.9076	0
72	25.0657	1
83	24.2568	1
77	23.9334	0
71	23.4375	1
63	16.6493	0
85	23.8054	0
47	21.4903	0
70	22.2222	1
